# Supplementary material for: Contaminant Transport from a Deep Geological Repository: Lumped Parameters Derived from a 3D Hydrogeological Model
Source: MDPI journal article supplement (doi:10.3390/en15186602), 2022-09-09
Supplement: s1 [file s1]

Archive with 3 entries (3 files):
- Document S1.pdf
- Document S2.pdf
- Document S3.pdf
